# Supplementary material for: Global Economic Burden of Diabetes in Adults: Projections From 2015 to 2030
Source: Oxford University Press journal article supplement (doi:10.2337/dc17-1962), 2018-02-23
Supplement: dc171962supplementarydata.pdf [file dc171962supplementarydata.pdf]

SUPPLEMENTARY DATA

**Details on handling of uncertainty**

As mentioned in the article, confidence intervals for cost estimates reflect the sampling error underlying the prevalence and mortality data used to project the future number of individuals and deaths due to diabetes. While additional assumptions for the calculation of excess costs per patient were introduced, we did not aim to incorporate these in the confidence intervals in order to ensure that confidence intervals can be easily interpreted in line with standard sampling theory. As we made use of age-, sex-, and location-specific (i.e. rural vs. urban) prevalence and age- and sex-specific mortality data – and consequently age- and sex-specific (and location-specific) confidence intervals – it was necessary to first aggregate standard errors across these strata in order to be able to calculate aggregate country-level as well as global-level confidence intervals. Since the exact correlation structure between strata was unknown, we aggregated standard errors within countries with a correlation coefficient of one and across countries with a correlation coefficient of zero. The rationale for this assumption was that random shocks within countries are likely to affect all strata in a similar manner while it is unlikely that shocks across countries stand in any relation to each other.

**Supplementary Table S1.** Projected per capita GDP, adult diabetes prevalence and number of deaths by country

| Country             | 2015     |                      |                   | Projections for 2030 |                      |                   |                      |                   |                      |                   |
|---------------------|----------|----------------------|-------------------|----------------------|----------------------|-------------------|----------------------|-------------------|----------------------|-------------------|
|                     | GDP p.c. | Prevalence (20 – 79) | #deaths (20 – 65) | GDP p.c.             | All scenarios        | Baseline scenario | Past-trends scenario | Target scenario   | Prevalence (20 – 79) | #deaths (20 – 65) |
|                     |          |                      |                   |                      | Prevalence (20 – 79) | #deaths (20 – 65) | Prevalence (20 – 79) | #deaths (20 – 65) |                      |                   |
| Afghanistan         | 605.75   | 6.5                  | 16460             | 706.03               | 6.9                  | 28389             | 8.3                  | 34105             | 6.3                  | 18926             |
| Albania             | 3932.22  | 12.0                 | 1120              | 6113.98              | 13.7                 | 1210              | 17.0                 | 1185              | 13.1                 | 806               |
| Algeria             | 4154.12  | 6.8                  | 8496              | 4859.34              | 8.1                  | 12566             | 9.5                  | 12623             | 8.0                  | 8377              |
| Angola              | 4114.87  | 3.3                  | 5465              | 5293.91              | 3.5                  | 9188              | 4.4                  | 10844             | 3.3                  | 6126              |
| Antigua and Barbuda | 14764.49 | 13.7                 | 63                | 18602.89             | 16.0                 | 85                | 17.0                 | 76                | 16.4                 | 56                |
| Argentina           | 13467.42 | 6.2                  | 9704              | 17756.61             | 6.7                  | 12313             | 7.1                  | 11319             | 6.7                  | 8208              |
| Armenia             | 3489.13  | 7.2                  | 1136              | 5114.64              | 8.2                  | 1214              | 10.3                 | 1246              | 7.9                  | 809               |

SUPPLEMENTARY DATA

|                           |              |      |       |              |      |            |      |            |      |       |
|---------------------------|--------------|------|-------|--------------|------|------------|------|------------|------|-------|
| Australia                 | 5613<br>0.20 | 6.3  | 2312  | 7792<br>6.42 | 6.9  | 2680       | 6.7  | 1937       | 6.7  | 1786  |
| Austria                   | 4411<br>7.69 | 9.5  | 1390  | 5798<br>6.61 | 11.0 | 1657       | 12.3 | 1278       | 11.0 | 1105  |
| Azerbaijan                | 5441.<br>31  | 6.3  | 2819  | 8146.<br>70  | 8.0  | 3746       | 10.1 | 3798       | 7.7  | 2497  |
| Bahamas,<br>The           | 2281<br>8.47 | 13.3 | 247   | 2640<br>5.80 | 15.1 | 303        | 16.1 | 276        | 15.5 | 202   |
| Bahrain                   | 2260<br>0.21 | 15.6 | 604   | 2846<br>0.37 | 19.6 | 989        | 21.7 | 863        | 20.1 | 659   |
| Bangladesh                | 1211.<br>70  | 7.4  | 96319 | 2109.<br>05  | 8.8  | 14911<br>4 | 11.0 | 16542<br>0 | 8.5  | 99410 |
| Barbados                  | 1555<br>7.94 | 17.0 | 156   | 1887<br>0.98 | 19.2 | 161        | 20.5 | 148        | 19.6 | 108   |
| Belarus                   | 5945.<br>22  | 6.5  | 3514  | 7788.<br>28  | 7.6  | 3371       | 9.5  | 3370       | 7.3  | 2247  |
| Belgium                   | 4026<br>7.60 | 6.7  | 1594  | 5246<br>5.05 | 7.4  | 1700       | 8.3  | 1293       | 7.2  | 1134  |
| Belize                    | 4850.<br>01  | 14.2 | 227   | 5773.<br>51  | 15.6 | 373        | 17.9 | 399        | 15.9 | 249   |
| Benin                     | 762.0<br>5   | 0.6  | 464   | 934.3<br>7   | 0.7  | 767        | 0.8  | 851        | 0.7  | 511   |
| Bhutan                    | 2656.<br>00  | 7.9  | 124   | 5110.<br>79  | 10.0 | 197        | 12.6 | 224        | 8.4  | 132   |
| Bolivia                   | 3077.<br>03  | 6.5  | 3054  | 4177.<br>60  | 7.1  | 4551       | 8.2  | 4927       | 6.8  | 3034  |
| Bosnia<br>and<br>Herzego. | 4244.<br>63  | 12.3 | 1210  | 6343.<br>67  | 14.3 | 1185       | 17.8 | 1172       | 13.9 | 790   |
| Botswana                  | 6378.<br>21  | 4.0  | 1200  | 8364.<br>55  | 5.1  | 1850       | 6.3  | 2206       | 5.0  | 1233  |
| Brazil                    | 8677.<br>77  | 10.2 | 77569 | 1168<br>6.41 | 12.2 | 10394<br>3 | 14.1 | 11418<br>0 | 11.3 | 69295 |
| Brunei                    | 3055<br>4.73 | 12.9 | 206   | 2827<br>7.77 | 15.3 | 330        | 14.9 | 243        | 15.9 | 220   |
| Darussala<br>m            | 7021.<br>06  | 8.3  | 2656  | 1018<br>7.71 | 9.2  | 2413       | 11.5 | 2414       | 8.7  | 1609  |
| Bulgaria                  | 615.7<br>6   | 1.8  | 2914  | 763.6<br>8   | 1.8  | 4920       | 2.2  | 5357       | 1.8  | 3280  |
| Burkina<br>Faso           | 277.0<br>7   | 2.3  | 2691  | 322.1<br>2   | 2.9  | 4532       | 3.4  | 4872       | 2.8  | 3021  |
| Burundi                   | 3024.<br>56  | 1.9  | 45    | 4676.<br>42  | 2.3  | 75         | 2.9  | 89         | 2.3  | 50    |
| Cabo<br>Verde             | 1158.<br>69  | 2.6  | 4286  | 2148.<br>73  | 3.0  | 6233       | 3.6  | 6907       | 2.9  | 4155  |
| Cambodia                  | 1217.<br>26  | 5.2  | 13179 | 1472.<br>54  | 5.8  | 21397      | 7.2  | 25200      | 5.6  | 14264 |
| Cameroon                  | 4320         | 9.5  | 7458  | 5214         | 10.5 | 7968       | 10.8 | 7326       | 11.1 | 5312  |
| Canada                    |              |      |       |              |      |            |      |            |      |       |

SUPPLEMENTARY DATA

|                      |          |      |        |          |      |        |      |         |      |        |
|----------------------|----------|------|--------|----------|------|--------|------|---------|------|--------|
|                      | 5.64     |      |        | 6.65     |      |        |      |         |      |        |
| Central African Rep. | 323.20   | 5.2  | 3276   | 240.64   | 5.7  | 5103   | 6.8  | 5501    | 5.5  | 3402   |
| Chad                 | 775.70   | 4.5  | 6345   | 908.67   | 4.6  | 11073  | 5.5  | 11944   | 4.4  | 7382   |
| Chile                | 13512.15 | 11.0 | 4609   | 23087.48 | 12.7 | 5962   | 13.5 | 5518    | 12.9 | 3975   |
| China                | 8040.90  | 10.6 | 799224 | 15431.34 | 13.1 | 979653 | 15.7 | 1106080 | 13.4 | 653102 |
| Colombia             | 6044.53  | 9.6  | 11466  | 8640.87  | 11.6 | 15429  | 13.5 | 16902   | 10.9 | 10286  |
| Comoros              | 717.45   | 7.5  | 232    | 631.42   | 8.4  | 383    | 10.1 | 431     | 8.0  | 255    |
| Congo, Dem. Rep.     | 468.36   | 5.3  | 27866  | 559.80   | 5.5  | 46995  | 6.6  | 50873   | 5.0  | 31330  |
| Congo, Rep.          | 1851.20  | 6.0  | 2386   | 2055.42  | 6.3  | 3749   | 7.9  | 4434    | 6.0  | 2499   |
| Costa Rica           | 11406.37 | 8.6  | 900    | 16649.75 | 10.3 | 1208   | 11.9 | 1332    | 10.0 | 805    |
| Cote d'Ivoire        | 1446.09  | 1.9  | 4030   | 1759.70  | 1.9  | 6199   | 2.4  | 7332    | 1.9  | 4132   |
| Croatia              | 11479.41 | 6.8  | 912    | 14098.72 | 7.2  | 850    | 8.0  | 654     | 7.1  | 567    |
| Cuba                 | 7650.23  | 12.1 | 3942   | 9838.01  | 14.4 | 4679   | 16.8 | 5186    | 14.1 | 3120   |
| Cyprus               | 16785.33 | 10.4 | 197    | 20511.63 | 11.9 | 246    | 13.5 | 197     | 12.5 | 164    |
| Czech Republic       | 17561.71 | 9.9  | 3319   | 29075.30 | 11.3 | 3413   | 12.6 | 2680    | 11.0 | 2275   |
| Denmark              | 53149.32 | 9.8  | 1340   | 66286.59 | 10.2 | 1378   | 11.5 | 1053    | 9.9  | 918    |
| Djibouti             | 1945.12  | 7.4  | 514    | 2439.18  | 8.3  | 754    | 9.6  | 732     | 8.0  | 503    |
| Dominican Republic   | 6468.47  | 8.1  | 4331   | 10636.23 | 9.1  | 5560   | 10.6 | 6070    | 9.0  | 3707   |
| Ecuador              | 6205.06  | 8.5  | 4951   | 7547.93  | 9.6  | 7030   | 11.1 | 7667    | 9.3  | 4687   |
| Egypt, Arab Rep.     | 3635.72  | 14.9 | 50072  | 5250.75  | 16.9 | 73327  | 19.7 | 74901   | 15.9 | 48885  |
| El Salvador          | 4252.34  | 8.8  | 1879   | 6237.04  | 9.7  | 2394   | 11.2 | 2609    | 9.2  | 1596   |
| Equatorial Guinea    | 14392.02 | 7.0  | 499    | 16690.37 | 7.0  | 752    | 8.7  | 890     | 7.0  | 502    |
| Eritrea              | 817.99   | 3.0  | 1030   | 958.52   | 3.8  | 1722   | 4.6  | 1870    | 3.6  | 1148   |
| Estonia              | 17111.98 | 6.0  | 278    | 28238.78 | 6.8  | 272    | 7.5  | 209     | 6.9  | 182    |
| Ethiopia             | 648.6    | 2.9  | 19578  | 1147.    | 3.5  | 33567  | 4.2  | 36354   | 3.3  | 22378  |

SUPPLEMENTARY DATA

|                          |              |      |            |              |      |            |      |             |      |        |
|--------------------------|--------------|------|------------|--------------|------|------------|------|-------------|------|--------|
|                          | 0            |      |            | 27           |      |            |      |             |      |        |
| Fiji                     | 4921.<br>92  | 13.4 | 884        | 6260.<br>72  | 14.8 | 1038       | 17.5 | 1157        | 14.6 | 692    |
| Finland                  | 4222<br>1.04 | 9.0  | 1117       | 5844<br>4.76 | 9.5  | 1008       | 10.7 | 792         | 9.3  | 672    |
| France                   | 3779<br>0.96 | 7.4  | 11589      | 5171<br>8.95 | 7.9  | 11570      | 8.8  | 9170        | 7.3  | 7713   |
| Gabon                    | 8266.<br>45  | 6.8  | 797        | 9005.<br>45  | 7.3  | 1239       | 9.1  | 1467        | 7.2  | 826    |
| Gambia,<br>The           | 471.5<br>4   | 1.6  | 166        | 465.9<br>1   | 1.7  | 286        | 2.0  | 317         | 1.6  | 191    |
| Georgia                  | 3498.<br>55  | 7.5  | 1300       | 4763.<br>55  | 8.9  | 1461       | 11.2 | 1434        | 7.9  | 974    |
| Germany                  | 4168<br>6.21 | 10.6 | 16381      | 4920<br>3.70 | 11.9 | 17558      | 13.4 | 13645       | 10.8 | 11706  |
| Ghana                    | 1369.<br>70  | 1.9  | 4084       | 1862.<br>11  | 2.1  | 6245       | 2.6  | 7420        | 2.0  | 4163   |
| Greece                   | 1778<br>7.95 | 7.5  | 1451       | 3077<br>1.37 | 8.6  | 1586       | 9.5  | 1220        | 8.5  | 1058   |
| Grenada                  | 9212.<br>02  | 10.3 | 53         | 1215<br>6.75 | 12.1 | 71         | 14.0 | 76          | 12.3 | 47     |
| Guatemala                | 3901.<br>85  | 9.1  | 6018       | 4709.<br>80  | 9.8  | 9784       | 11.3 | 10593       | 9.4  | 6523   |
| Guinea                   | 531.3<br>2   | 1.9  | 1599       | 616.0<br>7   | 1.9  | 2538       | 2.3  | 2785        | 1.8  | 1692   |
| Guinea-<br>Bissau        | 572.9<br>9   | 1.9  | 325        | 641.5<br>3   | 2.0  | 500        | 2.4  | 548         | 1.9  | 333    |
| Guyana                   | 4144.<br>40  | 11.2 | 657        | 5568.<br>30  | 11.8 | 749        | 13.6 | 825         | 11.9 | 500    |
| Haiti                    | 814.5<br>5   | 5.6  | 4404       | 980.3<br>1   | 6.5  | 6532       | 6.9  | 6236        | 6.4  | 4354   |
| Honduras                 | 2581.<br>32  | 7.4  | 1600       | 3244.<br>33  | 8.6  | 2583       | 9.9  | 2817        | 8.1  | 1722   |
| Hungary                  | 1235<br>0.58 | 9.3  | 4440       | 1729<br>2.70 | 10.3 | 4513       | 11.6 | 3595        | 10.1 | 3009   |
| Iceland                  | 5094<br>8.52 | 7.5  | 40         | 6117<br>1.50 | 8.8  | 45         | 9.9  | 34          | 8.8  | 30     |
| India                    | 1610.<br>73  | 8.7  | 69654<br>7 | 3247.<br>48  | 9.9  | 96382<br>4 | 12.5 | 10945<br>15 | 9.7  | 642549 |
| Indonesia                | 3343.<br>86  | 6.2  | 14064<br>3 | 6443.<br>75  | 7.1  | 19646<br>3 | 8.4  | 21624<br>2  | 6.6  | 130975 |
| Iran,<br>Islamic<br>Rep. | 4973.<br>32  | 8.5  | 21899      | 6185.<br>87  | 11.6 | 35607      | 13.5 | 36248       | 11.1 | 23738  |
| Iraq                     | 4932.<br>00  | 7.2  | 11613      | 5661.<br>42  | 8.0  | 20339      | 9.3  | 20299       | 7.5  | 13559  |

SUPPLEMENTARY DATA

2015

Projections for 2030

| Country         | 2015         |                      |                   | Projections for 2030   |                                        |                                     |                                           |                                        |                                      |                                   |
|-----------------|--------------|----------------------|-------------------|------------------------|----------------------------------------|-------------------------------------|-------------------------------------------|----------------------------------------|--------------------------------------|-----------------------------------|
|                 | GDP p.c.     | Prevalence (20 – 79) | #deaths (20 – 65) | All scenarios GDP p.c. | Baseline scenario Prevalence (20 – 79) | Baseline scenario #deaths (20 – 65) | Past-trends scenario Prevalence (20 – 79) | Past-trends scenario #deaths (20 – 65) | Target scenario Prevalence (20 – 79) | Target scenario #deaths (20 – 65) |
| Ireland         | 6051<br>3.63 | 5.3                  | 456               | 8424<br>7.24           | 6.0                                    | 562                                 | 6.7                                       | 432                                    | 5.9                                  | 375                               |
| Israel          | 3712<br>9.76 | 8.5                  | 944               | 4715<br>3.54           | 9.3                                    | 1165                                | 10.5                                      | 1088                                   | 9.3                                  | 776                               |
| Italy           | 3051<br>7.94 | 7.8                  | 6526              | 4169<br>8.45           | 9.0                                    | 7229                                | 10.1                                      | 5561                                   | 9.1                                  | 4820                              |
| Jamaica         | 5105.<br>72  | 11.3                 | 1147              | 6053.<br>25            | 13.5                                   | 1422                                | 15.7                                      | 1545                                   | 12.8                                 | 948                               |
| Japan           | 3462<br>8.71 | 7.6                  | 31471             | 4285<br>6.09           | 8.0                                    | 29869                               | 7.8                                       | 22863                                  | 7.6                                  | 19913                             |
| Jordan          | 4940.<br>05  | 9.1                  | 1981              | 6137.<br>05            | 11.0                                   | 3430                                | 12.8                                      | 3512                                   | 11.6                                 | 2287                              |
| Kazakhstan      | 1046<br>1.62 | 6.2                  | 6544              | 1411<br>4.52           | 7.3                                    | 8384                                | 9.1                                       | 8569                                   | 6.9                                  | 5590                              |
| Kenya           | 1384.<br>74  | 2.2                  | 8701              | 1677.<br>90            | 2.5                                    | 14070                               | 3.1                                       | 16425                                  | 2.4                                  | 9380                              |
| Kiribati        | 1424.<br>28  | 16.3                 | 99                | 1430.<br>30            | 18.0                                   | 138                                 | 21.3                                      | 154                                    | 17.9                                 | 92                                |
| Korea, Rep.     | 2749<br>3.92 | 8.7                  | 17822             | 4012<br>3.30           | 11.1                                   | 21346                               | 10.8                                      | 16293                                  | 10.7                                 | 14230                             |
| Kuwait          | 2930<br>0.58 | 14.3                 | 697               | 3244<br>9.89           | 18.8                                   | 1289                                | 20.9                                      | 1164                                   | 20.5                                 | 859                               |
| Kyrgyz Republic | 1124.<br>28  | 5.1                  | 1587              | 1328.<br>19            | 6.5                                    | 2293                                | 8.1                                       | 2339                                   | 6.1                                  | 1529                              |
| Lao PDR         | 2115.<br>59  | 2.9                  | 2232              | 4066.<br>80            | 3.6                                    | 3539                                | 4.3                                       | 3878                                   | 3.5                                  | 2359                              |
| Latvia          | 1371<br>5.30 | 7.3                  | 538               | 1868<br>9.22           | 7.9                                    | 519                                 | 8.7                                       | 398                                    | 7.5                                  | 346                               |
| Lebanon         | 8047.<br>65  | 12.2                 | 2674              | 1087<br>7.08           | 15.4                                   | 3343                                | 18.2                                      | 3477                                   | 15.0                                 | 2229                              |
| Lesotho         | 1093.<br>76  | 2.9                  | 1373              | 1571.<br>57            | 3.2                                    | 1963                                | 4.1                                       | 2307                                   | 3.0                                  | 1309                              |
| Liberia         | 451.6        | 1.9                  | 647               | 535.4                  | 2.0                                    | 1035                                | 2.3                                       | 1138                                   | 1.8                                  | 690                               |

SUPPLEMENTARY DATA

|                       |           |      |       |           |      |       |      |       |      |       |
|-----------------------|-----------|------|-------|-----------|------|-------|------|-------|------|-------|
|                       | 5         |      |       | 1         |      |       |      |       |      |       |
| Libya                 | 6644.11   | 9.2  | 1703  | 5312.44   | 11.2 | 2851  | 13.1 | 2907  | 11.8 | 1901  |
| Lithuania             | 14383.67  | 5.4  | 797   | 21264.90  | 6.0  | 766   | 6.6  | 590   | 5.9  | 511   |
| Luxembourg            | 102357.99 | 5.7  | 65    | 134724.47 | 6.6  | 86    | 7.3  | 67    | 6.6  | 57    |
| Macedonia, FYR        | 4836.13   | 12.0 | 830   | 6579.28   | 13.9 | 909   | 17.2 | 898   | 13.7 | 606   |
| Madagascar            | 401.84    | 3.3  | 4358  | 420.15    | 3.6  | 7327  | 4.3  | 8093  | 3.4  | 4885  |
| Malawi                | 370.21    | 2.7  | 7297  | 427.87    | 2.9  | 13543 | 3.5  | 14588 | 2.8  | 9029  |
| Malaysia              | 9768.33   | 16.6 | 23991 | 15439.58  | 19.2 | 34593 | 22.8 | 38860 | 18.3 | 23062 |
| Maldives              | 9446.39   | 7.5  | 44    | 17082.60  | 9.5  | 81    | 12.0 | 94    | 9.3  | 54    |
| Mali                  | 724.26    | 1.8  | 1983  | 957.29    | 1.8  | 3349  | 2.2  | 3652  | 1.7  | 2233  |
| Malta                 | 24570.68  | 13.9 | 102   | 35562.58  | 14.9 | 101   | 16.8 | 93    | 14.6 | 67    |
| Mauritania            | 1190.94   | 2.0  | 493   | 1416.17   | 2.1  | 776   | 2.6  | 924   | 2.0  | 517   |
| Mauritius             | 9175.03   | 24.2 | 1604  | 15833.97  | 26.8 | 1792  | 33.2 | 2164  | 25.3 | 1195  |
| Mexico                | 9062.06   | 14.7 | 50500 | 11915.30  | 17.0 | 75201 | 19.6 | 82873 | 16.6 | 50134 |
| Micronesia, Fed. Sts. | 3015.23   | 13.6 | 73    | 3361.02   | 14.2 | 82    | 16.9 | 91    | 14.0 | 55    |
| Moldova               | 1600.65   | 7.7  | 1766  | 2053.94   | 9.3  | 1839  | 11.6 | 1834  | 9.4  | 1226  |
| Mongolia              | 3967.83   | 5.1  | 2087  | 7024.62   | 5.8  | 2905  | 6.9  | 3292  | 5.5  | 1936  |
| Montenegro            | 6423.80   | 12.8 | 264   | 8381.77   | 13.9 | 267   | 17.2 | 263   | 13.6 | 178   |
| Morocco               | 2926.14   | 7.7  | 5876  | 4313.75   | 9.1  | 8233  | 10.7 | 8442  | 9.1  | 5489  |
| Mozambique            | 528.93    | 2.3  | 9143  | 761.73    | 2.4  | 14491 | 2.9  | 15530 | 2.2  | 9661  |
| Myanmar               | 1161.49   | 6.5  | 49517 | 2643.44   | 7.6  | 65558 | 8.9  | 72190 | 7.1  | 43705 |
| Namibia               | 4673.57   | 3.5  | 917   | 6296.79   | 4.0  | 1390  | 5.0  | 1638  | 4.0  | 926   |
| Nepal                 | 747.48    | 3.3  | 7603  | 1167.08   | 4.0  | 10697 | 4.8  | 12942 | 3.8  | 7131  |
| Netherlands           | 44332.13  | 7.9  | 2408  | 61778.00  | 9.0  | 2477  | 10.1 | 1866  | 9.0  | 1651  |
| New                   | 3876      | 9.1  | 721   | 4999      | 9.8  | 799   | 9.5  | 581   | 10.2 | 533   |

SUPPLEMENTARY DATA

|                     |          |      |       |          |      |       |      |        |      |       |
|---------------------|----------|------|-------|----------|------|-------|------|--------|------|-------|
| Zealand             | 8.56     |      |       | 4.29     |      |       |      |        |      |       |
| Nicaragua           | 2095.97  | 7.7  | 1634  | 2736.12  | 9.2  | 2541  | 10.7 | 2779   | 8.6  | 1694  |
| Niger               | 358.96   | 1.9  | 2476  | 415.93   | 1.8  | 4186  | 2.1  | 4581   | 1.7  | 2791  |
| Nigeria             | 2640.29  | 1.9  | 35910 | 3215.12  | 1.9  | 55122 | 2.4  | 65195  | 1.9  | 36748 |
| Norway              | 74185.55 | 7.8  | 734   | 92748.66 | 8.6  | 834   | 9.7  | 642    | 8.6  | 556   |
| Oman                | 15550.86 | 9.9  | 836   | 19952.32 | 15.4 | 1542  | 17.0 | 1405   | 15.5 | 1028  |
| Pakistan            | 1434.70  | 6.9  | 58112 | 1939.21  | 7.7  | 90665 | 9.7  | 100910 | 7.3  | 60443 |
| Panama              | 13268.11 | 9.4  | 883   | 21827.40 | 10.9 | 1283  | 12.7 | 1408   | 10.3 | 855   |
| Papua New Guinea    | 2500.17  | 12.8 | 7454  | 3340.93  | 13.7 | 11652 | 16.3 | 12829  | 13.3 | 7768  |
| Paraguay            | 4109.37  | 8.4  | 1717  | 5612.39  | 9.4  | 2407  | 10.9 | 2638   | 9.0  | 1605  |
| Peru                | 6030.34  | 6.3  | 5419  | 8393.28  | 7.3  | 7852  | 8.4  | 8554   | 6.8  | 5235  |
| Philippines         | 2907.41  | 6.1  | 38855 | 4104.96  | 6.7  | 54721 | 7.9  | 61303  | 6.5  | 36481 |
| Poland              | 12362.46 | 7.6  | 10273 | 17488.18 | 8.9  | 9683  | 9.9  | 7506   | 8.5  | 6455  |
| Portugal            | 19235.37 | 13.6 | 2836  | 26950.32 | 15.3 | 2911  | 17.2 | 2293   | 15.3 | 1941  |
| Qatar               | 73653.39 | 13.5 | 417   | 83967.15 | 17.5 | 766   | 19.4 | 691    | 17.7 | 511   |
| Romania             | 9098.45  | 10.6 | 8763  | 14519.01 | 11.8 | 8595  | 14.8 | 8644   | 11.0 | 5730  |
| Russian Federation  | 9521.08  | 11.1 | 95049 | 15409.31 | 12.7 | 90235 | 15.7 | 90117  | 12.0 | 60157 |
| Rwanda              | 711.57   | 3.5  | 4008  | 994.81   | 4.8  | 6669  | 5.7  | 7214   | 4.3  | 4446  |
| Samoa               | 4160.77  | 7.2  | 106   | 5071.44  | 7.6  | 129   | 9.1  | 143    | 7.6  | 86    |
| Sao Tome and Princ. | 1669.06  | 1.8  | 18    | 1942.19  | 2.0  | 30    | 2.5  | 36     | 1.9  | 20    |
| Saudi Arabia        | 20743.89 | 17.6 | 16578 | 23767.49 | 21.3 | 31416 | 23.5 | 27759  | 21.8 | 20944 |
| Senegal             | 899.58   | 1.8  | 1468  | 1020.00  | 1.9  | 2536  | 2.3  | 2804   | 1.9  | 1691  |
| Serbia              | 4198.45  | 13.2 | 4245  | 5279.53  | 14.1 | 3937  | 17.5 | 3886   | 13.9 | 2625  |
| Seychelles          | 14903.15 | 17.4 | 78    | 21817.55 | 22.5 | 102   | 28.4 | 115    | 22.0 | 68    |
| Sierra              | 658.8    | 1.8  | 1407  | 682.8    | 1.9  | 2149  | 2.3  | 2339   | 1.8  | 1433  |

SUPPLEMENTARY DATA

|                       |       |      |       |       |      |       |      |       |      |       |
|-----------------------|-------|------|-------|-------|------|-------|------|-------|------|-------|
| Leone                 | 7     |      |       | 7     |      |       |      |       |      |       |
|                       | 5297  | 12.8 | 2275  | 7164  | 15.4 | 2817  | 14.9 | 2076  | 19.1 | 1878  |
| Singapore             | 1.89  |      |       | 7.48  |      |       |      |       |      |       |
| Slovak Republic       | 1608  | 9.8  | 1827  | 2470  | 12.4 | 1923  | 13.7 | 1473  | 12.4 | 1282  |
|                       | 2.46  |      |       | 6.17  |      |       |      |       |      |       |
| Slovenia              | 2068  | 10.7 | 554   | 2925  | 12.7 | 575   | 14.1 | 443   | 13.4 | 383   |
|                       | 9.81  |      |       | 4.79  |      |       |      |       |      |       |
| Solomon Islands       | 1934. | 13.6 | 321   | 2269. | 14.6 | 524   | 17.4 | 584   | 14.0 | 349   |
|                       | 86    |      |       | 86    |      |       |      |       |      |       |
| South Africa          | 5825. | 7.0  | 49647 | 1087  | 7.7  | 61593 | 9.5  | 72810 | 7.4  | 41062 |
|                       | 00    |      |       | 7.24  |      |       |      |       |      |       |
| South Sudan           | 730.5 | 6.6  | 4657  | 652.5 | 6.8  | 7536  | 8.1  | 8320  | 6.5  | 5024  |
|                       | 8     |      |       | 3     |      |       |      |       |      |       |
| Spain                 | 2586  | 10.4 | 8451  | 3456  | 12.6 | 10178 | 14.0 | 7992  | 14.5 | 6785  |
|                       | 5.38  |      |       | 0.05  |      |       |      |       |      |       |
| Sri Lanka             | 3891. | 8.5  | 8506  | 7400. | 9.3  | 9515  | 11.8 | 10872 | 9.7  | 6343  |
|                       | 48    |      |       | 51    |      |       |      |       |      |       |
| St. Lucia             | 7735. | 10.9 | 70    | 9748. | 12.5 | 93    | 14.5 | 101   | 13.0 | 62    |
|                       | 91    |      |       | 69    |      |       |      |       |      |       |
| St. Vinc. & the Gren. | 6739. | 11.7 | 69    | 8417. | 13.7 | 80    | 15.8 | 88    | 13.9 | 53    |
|                       | 17    |      |       | 43    |      |       |      |       |      |       |
| Sudan                 | 2414. | 7.7  | 18320 | 3277. | 8.2  | 29516 | 10.3 | 35010 | 8.2  | 19677 |
|                       | 72    |      |       | 26    |      |       |      |       |      |       |
| Suriname              | 8985. | 12.2 | 345   | 1129  | 13.5 | 436   | 15.6 | 477   | 13.3 | 291   |
|                       | 19    |      |       | 0.59  |      |       |      |       |      |       |
| Swaziland             | 3215. | 2.8  | 1042  | 3823. | 2.9  | 1512  | 3.7  | 1766  | 2.9  | 1008  |
|                       | 02    |      |       | 79    |      |       |      |       |      |       |
| Sweden                | 5068  | 6.3  | 1085  | 6826  | 6.6  | 1134  | 7.4  | 861   | 6.7  | 756   |
|                       | 7.47  |      |       | 8.49  |      |       |      |       |      |       |
| Switzerland           | 8083  | 7.7  | 968   | 9991  | 8.7  | 1138  | 9.7  | 860   | 8.5  | 759   |
|                       | 1.09  |      |       | 4.21  |      |       |      |       |      |       |
| Syrian Arab Republic  | 5152. | 7.0  | 4708  | 5937. | 7.7  | 9662  | 9.0  | 9787  | 7.3  | 6441  |
|                       | 43    |      |       | 67    |      |       |      |       |      |       |
| Tajikistan            | 925.9 | 4.5  | 1304  | 1113. | 5.6  | 2252  | 7.1  | 2265  | 5.3  | 1501  |
|                       | 1     |      |       | 69    |      |       |      |       |      |       |

2015

Projections for 2030

|  | Projections for 2030 |                   |                      |                 |
|--|----------------------|-------------------|----------------------|-----------------|
|  | All scenarios        | Baseline scenario | Past-trends scenario | Target scenario |
|  |                      |                   |                      |                 |



SUPPLEMENTARY DATA

| Country              | GDP p.c. | Prevalence (20 – 79) | #deaths (20 – 65) | GDP p.c. | Prevalence (20 – 79) | #deaths (20 – 65) | Prevalence (20 – 79) | #deaths (20 – 65) | Prevalence (20 – 79) | #deaths (20 – 65) |
|----------------------|----------|----------------------|-------------------|----------|----------------------|-------------------|----------------------|-------------------|----------------------|-------------------|
| Tanzania             | 853.34   | 3.5                  | 15303             | 1174.27  | 4.4                  | 25367             | 5.2                  | 27231             | 4.1                  | 16912             |
| Thailand             | 5874.61  | 8.0                  | 56382             | 9112.93  | 9.9                  | 62097             | 11.8                 | 69505             | 9.5                  | 41398             |
| Timor-Leste          | 1216.88  | 6.3                  | 425               | 1552.12  | 6.1                  | 552               | 7.3                  | 609               | 5.8                  | 368               |
| Togo                 | 559.60   | 4.0                  | 1906              | 669.09   | 4.4                  | 3086              | 5.2                  | 3369              | 4.1                  | 2057              |
| Tonga                | 4101.26  | 12.6                 | 67                | 5023.17  | 12.6                 | 87                | 14.9                 | 94                | 12.6                 | 58                |
| Trinidad and Tobago  | 1732.88  | 14.5                 | 989               | 2149.97  | 16.8                 | 1119              | 17.8                 | 1020              | 17.0                 | 746               |
| Tunisia              | 3834.93  | 9.5                  | 2915              | 4901.29  | 11.5                 | 3931              | 13.5                 | 4031              | 10.9                 | 2621              |
| Turkey               | 1092.48  | 12.5                 | 24893             | 1898.72  | 14.7                 | 34643             | 18.2                 | 34033             | 13.4                 | 23096             |
| Turkmenistan         | 6662.25  | 5.2                  | 1935              | 1206.43  | 6.5                  | 2845              | 8.1                  | 2894              | 6.0                  | 1897              |
| Uganda               | 713.67   | 2.5                  | 10466             | 948.39   | 3.0                  | 19295             | 3.6                  | 20663             | 2.9                  | 12864             |
| Ukraine              | 2030.86  | 8.0                  | 24256             | 1986.75  | 9.0                  | 23378             | 11.3                 | 23916             | 9.1                  | 15585             |
| United Arab Emirates | 3909.38  | 14.6                 | 1229              | 4196.60  | 19.1                 | 2197              | 21.2                 | 1979              | 19.2                 | 1465              |
| United Kingdom       | 4421.07  | 6.2                  | 8547              | 6101.36  | 6.7                  | 9586              | 7.5                  | 7368              | 6.7                  | 6390              |
| United States        | 5605.38  | 12.8                 | 119962            | 7390.57  | 13.6                 | 123558            | 13.9                 | 114406            | 14.0                 | 82372             |
| Uruguay              | 1552.83  | 6.9                  | 609               | 2142.95  | 7.2                  | 696               | 7.7                  | 643               | 7.1                  | 464               |
| Uzbekistan           | 2238.07  | 5.2                  | 6783              | 3382.90  | 6.7                  | 10177             | 8.3                  | 10363             | 6.2                  | 6784              |
| Vanuatu              | 2805.31  | 14.4                 | 192               | 2922.14  | 16.1                 | 312               | 19.1                 | 345               | 15.9                 | 208               |
| Venezuela, RB        | 1473.71  | 11.1                 | 10062             | 1535.65  | 12.9                 | 14294             | 14.9                 | 15730             | 12.0                 | 9529              |
| Vietnam              | 2067.91  | 5.6                  | 36962             | 3990.04  | 7.1                  | 51858             | 8.4                  | 58146             | 6.7                  | 34572             |
| Yemen, Rep.          | 1406.29  | 3.8                  | 4431              | 1513.20  | 4.4                  | 7538              | 5.1                  | 7393              | 4.2                  | 5025              |

SUPPLEMENTARY DATA

|        |         |     |      |         |     |       |     |       |     |      |
|--------|---------|-----|------|---------|-----|-------|-----|-------|-----|------|
| Zambia | 1304.88 | 3.1 | 7539 | 1611.64 | 3.4 | 13418 | 4.3 | 15760 | 3.3 | 8945 |
|--------|---------|-----|------|---------|-----|-------|-----|-------|-----|------|

Age range in parentheses. GDP per capita presented in 2015 US-\$. Prevalence estimates are percentage of adult population (20 – 79) suffering from diabetes and “#deaths” is the absolute number of people dying due to diabetes.

**Supplementary Table S2.** Cost projections by country

| Country             | 2015                     |                   |                      | Projections for 2030     |                   |                          |                   |                          |                   |
|---------------------|--------------------------|-------------------|----------------------|--------------------------|-------------------|--------------------------|-------------------|--------------------------|-------------------|
|                     | Total costs (Billion \$) | Total costs / GDP | Share indirect costs | Baseline scenario        |                   | Past-trends scenario     |                   | Target scenario          |                   |
|                     |                          |                   |                      | Total costs (Billion \$) | Total costs / GDP | Total costs (Billion \$) | Total costs / GDP | Total costs (Billion \$) | Total costs / GDP |
| Afghanistan         | 0.25                     | 1.3               | 46.8                 | 0.53                     | 1.7               | 0.63                     | 2.0               | 0.43                     | 1.4               |
| Albania             | 0.25                     | 2.2               | 29.5                 | 0.46                     | 2.5               | 0.56                     | 3.1               | 0.42                     | 2.3               |
| Algeria             | 2.59                     | 1.6               | 21.1                 | 4.62                     | 2.0               | 5.32                     | 2.3               | 4.37                     | 1.9               |
| Angola              | 0.71                     | 0.7               | 48.6                 | 1.60                     | 0.8               | 1.95                     | 0.9               | 1.34                     | 0.6               |
| Antigua and Barbuda | 0.02                     | 1.8               | 67.4                 | 0.04                     | 1.9               | 0.04                     | 1.9               | 0.03                     | 1.7               |
| Argentina           | 3.21                     | 0.5               | 59.2                 | 5.27                     | 0.6               | 5.36                     | 0.6               | 4.83                     | 0.6               |
| Armenia             | 0.12                     | 1.1               | 38.6                 | 0.20                     | 1.3               | 0.24                     | 1.6               | 0.18                     | 1.2               |
| Australia           | 10.65                    | 0.8               | 33.6                 | 17.43                    | 0.8               | 16.56                    | 0.7               | 16.32                    | 0.7               |
| Austria             | 5.43                     | 1.4               | 26.6                 | 7.73                     | 1.5               | 8.49                     | 1.7               | 7.51                     | 1.5               |
| Azerbaijan          | 0.71                     | 1.3               | 11.2                 | 1.44                     | 1.6               | 1.80                     | 2.1               | 1.35                     | 1.5               |
| Bahamas, The        | 0.18                     | 2.0               | 56.8                 | 0.25                     | 2.1               | 0.26                     | 2.2               | 0.23                     | 2.0               |
| Bahrain             | 0.59                     | 1.9               | 47.1                 | 1.16                     | 2.5               | 1.23                     | 2.6               | 1.13                     | 2.4               |
| Bangladesh          | 1.68                     | 0.9               | 73.1                 | 4.12                     | 1.0               | 4.74                     | 1.2               | 3.27                     | 0.8               |
| Barbados            | 0.09                     | 2.0               | 53.1                 | 0.11                     | 2.0               | 0.12                     | 2.1               | 0.11                     | 2.0               |
| Belarus             | 1.03                     | 1.8               | 24.2                 | 1.43                     | 2.1               | 1.76                     | 2.5               | 1.27                     | 1.8               |
| Belgium             | 4.73                     | 1.0               | 33.1                 | 6.61                     | 1.0               | 7.14                     | 1.1               | 6.25                     | 1.0               |
| Belize              | 0.04                     | 2.2               | 33.1                 | 0.07                     | 2.6               | 0.08                     | 2.9               | 0.07                     | 2.4               |
| Benin               | 0.01                     | 0.1               | 25.1                 | 0.02                     | 0.1               | 0.02                     | 0.2               | 0.02                     | 0.1               |
| Bhutan              | 0.01                     | 0.6               | 44.5                 | 0.04                     | 0.8               | 0.04                     | 1.0               | 0.03                     | 0.6               |
| Bolivia             | 0.46                     | 1.4               | 19.9                 | 0.91                     | 1.7               | 1.05                     | 1.9               | 0.85                     | 1.5               |
| Bosnia              | 0.44                     | 2.7               | 21.0                 | 0.75                     | 3.3               | 0.93                     | 4.1               | 0.71                     | 3.1               |

SUPPLEMENTARY DATA

and

Herzegovina

|                      |       |     |      |       |     |       |     |       |     |
|----------------------|-------|-----|------|-------|-----|-------|-----|-------|-----|
| Botswana             | 0.13  | 0.9 | 47.5 | 0.25  | 1.1 | 0.31  | 1.3 | 0.21  | 0.9 |
| Brazil               | 57.73 | 3.2 | 17.9 | 106.6 | 4.0 | 123.5 | 4.6 | 97.14 | 3.6 |
| Brunei               |       |     |      | 7     |     | 6     |     |       |     |
| Darussalam           | 0.20  | 1.5 | 75.4 | 0.26  | 1.8 | 0.23  | 1.6 | 0.23  | 1.7 |
| Bulgaria             | 1.10  | 2.2 | 16.7 | 1.51  | 2.3 | 1.86  | 2.9 | 1.41  | 2.2 |
| Burkina Faso         | 0.03  | 0.3 | 40.3 | 0.07  | 0.4 | 0.09  | 0.4 | 0.06  | 0.3 |
| Burundi              | 0.02  | 0.6 | 30.4 | 0.04  | 0.7 | 0.05  | 0.9 | 0.04  | 0.7 |
| Cabo Verde           | 0.01  | 0.4 | 16.7 | 0.01  | 0.5 | 0.02  | 0.6 | 0.01  | 0.5 |
| Cambodia             | 0.07  | 0.4 | 17.9 | 0.20  | 0.5 | 0.24  | 0.6 | 0.19  | 0.5 |
| Cameroon             | 0.27  | 1.0 | 39.0 | 0.54  | 1.1 | 0.67  | 1.4 | 0.47  | 1.0 |
| Canada               | 24.65 | 1.6 | 42.2 | 33.41 | 1.6 | 33.97 | 1.6 | 33.38 | 1.6 |
| Central African Rep. | 0.02  | 1.0 | 47.4 | 0.02  | 1.3 | 0.02  | 1.5 | 0.02  | 1.1 |
| Chad                 | 0.08  | 0.8 | 50.1 | 0.17  | 0.9 | 0.20  | 1.0 | 0.14  | 0.7 |
| Chile                | 3.85  | 1.6 | 48.8 | 8.12  | 1.7 | 8.44  | 1.8 | 7.82  | 1.7 |
| China                | 222.3 | 2.0 | 36.3 | 533.8 | 2.4 | 631.7 | 2.9 | 507.2 | 2.3 |
|                      | 2     |     |      | 5     |     | 2     |     | 5     |     |
| Colombia             | 7.03  | 2.4 | 13.7 | 14.41 | 3.1 | 16.78 | 3.7 | 13.35 | 2.9 |
| Comoros              | 0.01  | 1.4 | 18.6 | 0.01  | 1.8 | 0.01  | 2.1 | 0.01  | 1.6 |
| Congo, Dem. Rep.     | 0.27  | 0.7 | 41.3 | 0.56  | 0.8 | 0.65  | 1.0 | 0.46  | 0.7 |
| Congo, Rep.          | 0.17  | 2.0 | 19.0 | 0.30  | 2.2 | 0.38  | 2.7 | 0.28  | 2.0 |
| Costa Rica           | 1.19  | 2.2 | 19.7 | 2.48  | 2.7 | 2.88  | 3.2 | 2.36  | 2.6 |
| Cote d'Ivoire        | 0.16  | 0.5 | 35.4 | 0.30  | 0.5 | 0.37  | 0.7 | 0.27  | 0.5 |
| Croatia              | 0.47  | 1.0 | 45.8 | 0.55  | 1.0 | 0.57  | 1.0 | 0.50  | 0.9 |
| Cuba                 | 3.08  | 3.5 | 14.7 | 4.48  | 4.1 | 5.24  | 4.7 | 4.26  | 3.9 |
| Cyprus               | 0.29  | 1.5 | 30.2 | 0.45  | 1.7 | 0.50  | 1.9 | 0.46  | 1.7 |
| Czech Republic       | 2.01  | 1.1 | 35.1 | 3.48  | 1.1 | 3.72  | 1.2 | 3.24  | 1.1 |
| Denmark              | 4.94  | 1.6 | 35.8 | 6.30  | 1.6 | 6.80  | 1.7 | 5.85  | 1.5 |
| Djibouti             | 0.04  | 2.3 | 22.8 | 0.07  | 2.7 | 0.08  | 3.0 | 0.06  | 2.4 |
| Dominican Republic   | 0.92  | 1.3 | 41.2 | 1.99  | 1.5 | 2.27  | 1.8 | 1.78  | 1.4 |
| Ecuador              | 2.35  | 2.3 | 19.6 | 4.13  | 2.8 | 4.76  | 3.2 | 3.88  | 2.6 |
| Egypt, Arab Rep.     | 5.38  | 1.6 | 37.4 | 11.47 | 1.9 | 12.91 | 2.1 | 10.06 | 1.6 |
| El Salvador          | 0.44  | 1.7 | 25.6 | 0.79  | 2.0 | 0.91  | 2.3 | 0.72  | 1.8 |
| Equatorial Guinea    | 0.11  | 0.9 | 31.1 | 0.20  | 1.0 | 0.25  | 1.2 | 0.19  | 0.9 |

SUPPLEMENTARY DATA

|                          |       |     |      |       |     |       |     |       |     |
|--------------------------|-------|-----|------|-------|-----|-------|-----|-------|-----|
| Eritrea                  | 0.02  | 0.4 | 36.1 | 0.04  | 0.6 | 0.05  | 0.7 | 0.04  | 0.5 |
| Estonia                  | 0.16  | 0.7 | 40.8 | 0.26  | 0.7 | 0.27  | 0.8 | 0.25  | 0.7 |
| Ethiopia                 | 0.29  | 0.4 | 34.2 | 0.95  | 0.6 | 1.10  | 0.7 | 0.82  | 0.5 |
| Fiji                     | 0.10  | 2.3 | 54.0 | 0.15  | 2.5 | 0.17  | 2.9 | 0.12  | 2.1 |
| Finland                  | 2.92  | 1.3 | 32.2 | 3.96  | 1.2 | 4.31  | 1.3 | 3.76  | 1.1 |
| France                   | 28.60 | 1.2 | 29.7 | 40.58 | 1.2 | 43.94 | 1.2 | 36.64 | 1.0 |
| Gabon                    | 0.17  | 1.2 | 40.5 | 0.29  | 1.4 | 0.36  | 1.7 | 0.25  | 1.2 |
| Gambia,<br>The           | 0.00  | 0.3 | 20.0 | 0.01  | 0.4 | 0.01  | 0.4 | 0.00  | 0.3 |
| Georgia                  | 0.23  | 1.6 | 19.3 | 0.34  | 1.8 | 0.42  | 2.3 | 0.29  | 1.6 |
| Germany                  | 54.99 | 1.6 | 30.1 | 65.70 | 1.7 | 71.97 | 1.8 | 58.42 | 1.5 |
| Ghana                    | 0.11  | 0.3 | 32.6 | 0.23  | 0.3 | 0.28  | 0.4 | 0.20  | 0.3 |
| Greece                   | 1.50  | 0.8 | 36.2 | 2.64  | 0.8 | 2.82  | 0.9 | 2.49  | 0.8 |
| Grenada                  | 0.02  | 1.8 | 41.0 | 0.03  | 2.3 | 0.04  | 2.6 | 0.03  | 2.1 |
| Guatemala                | 0.98  | 1.5 | 35.4 | 1.91  | 1.9 | 2.17  | 2.2 | 1.70  | 1.7 |
| Guinea                   | 0.02  | 0.3 | 21.9 | 0.04  | 0.4 | 0.05  | 0.4 | 0.04  | 0.3 |
| Guinea-<br>Bissau        | 0.00  | 0.4 | 31.6 | 0.01  | 0.5 | 0.01  | 0.6 | 0.01  | 0.4 |
| Guyana                   | 0.08  | 2.4 | 56.8 | 0.11  | 2.4 | 0.12  | 2.7 | 0.10  | 2.1 |
| Haiti                    | 0.12  | 1.4 | 27.0 | 0.23  | 1.8 | 0.23  | 1.9 | 0.21  | 1.7 |
| Honduras                 | 0.36  | 1.7 | 22.9 | 0.73  | 2.3 | 0.84  | 2.7 | 0.67  | 2.1 |
| Hungary                  | 1.58  | 1.3 | 41.7 | 2.23  | 1.4 | 2.33  | 1.5 | 2.00  | 1.2 |
| Iceland                  | 0.19  | 1.1 | 37.2 | 0.28  | 1.3 | 0.31  | 1.4 | 0.28  | 1.2 |
| India                    | 22.00 | 1.0 | 56.4 | 60.46 | 1.2 | 72.62 | 1.5 | 51.41 | 1.0 |
| Indonesia                | 6.96  | 0.8 | 47.7 | 17.27 | 0.9 | 19.92 | 1.0 | 14.42 | 0.8 |
| Iran,<br>Islamic<br>Rep. | 5.43  | 1.4 | 20.7 | 11.44 | 2.1 | 13.23 | 2.4 | 10.58 | 1.9 |
| Iraq                     | 2.45  | 1.4 | 32.0 | 4.69  | 1.5 | 5.20  | 1.7 | 4.06  | 1.3 |
| Ireland                  | 1.65  | 0.6 | 36.3 | 2.78  | 0.6 | 3.00  | 0.7 | 2.59  | 0.6 |
| Israel                   | 2.54  | 0.8 | 32.4 | 4.20  | 0.9 | 4.64  | 1.0 | 4.11  | 0.9 |
| Italy                    | 16.29 | 0.9 | 29.1 | 23.15 | 0.9 | 25.32 | 1.0 | 22.76 | 0.9 |
| Jamaica                  | 0.26  | 1.8 | 39.5 | 0.39  | 2.2 | 0.44  | 2.5 | 0.34  | 2.0 |

---

SUPPLEMENTARY DATA

| Country               | 2015                     |                   |                      | Projections for 2030     |                   |                          |                   |                          |                   |
|-----------------------|--------------------------|-------------------|----------------------|--------------------------|-------------------|--------------------------|-------------------|--------------------------|-------------------|
|                       | Total costs (Billion \$) | Total costs / GDP | Share indirect costs | Baseline scenario        |                   | Past-trends scenario     |                   | Target scenario          |                   |
|                       |                          |                   |                      | Total costs (Billion \$) | Total costs / GDP | Total costs (Billion \$) | Total costs / GDP | Total costs (Billion \$) | Total costs / GDP |
| Japan                 | 38.07                    | 0.9               | 47.3                 | 43.44                    | 0.8               | 40.76                    | 0.8               | 38.78                    | 0.8               |
| Jordan                | 0.61                     | 1.6               | 26.2                 | 1.13                     | 2.0               | 1.28                     | 2.3               | 1.09                     | 2.0               |
| Kazakhstan            | 2.04                     | 1.1               | 31.7                 | 3.44                     | 1.2               | 4.18                     | 1.5               | 3.06                     | 1.1               |
| Kenya                 | 0.50                     | 0.8               | 43.9                 | 1.02                     | 0.9               | 1.25                     | 1.1               | 0.88                     | 0.8               |
| Kiribati              | 0.01                     | 4.1               | 31.2                 | 0.01                     | 4.6               | 0.01                     | 5.4               | 0.01                     | 4.3               |
| Korea, Rep.           | 17.01                    | 1.2               | 52.5                 | 28.46                    | 1.4               | 26.50                    | 1.3               | 25.48                    | 1.2               |
| Kuwait                | 1.40                     | 1.2               | 40.1                 | 2.66                     | 1.6               | 2.92                     | 1.8               | 2.82                     | 1.7               |
| Kyrgyz Republic       | 0.07                     | 1.0               | 24.9                 | 0.12                     | 1.3               | 0.15                     | 1.6               | 0.11                     | 1.1               |
| Lao PDR               | 0.03                     | 0.2               | 44.7                 | 0.09                     | 0.3               | 0.11                     | 0.3               | 0.08                     | 0.2               |
| Latvia                | 0.24                     | 0.9               | 49.7                 | 0.30                     | 0.9               | 0.31                     | 0.9               | 0.27                     | 0.8               |
| Lebanon               | 1.07                     | 2.3               | 28.0                 | 1.73                     | 3.0               | 2.01                     | 3.5               | 1.59                     | 2.8               |
| Lesotho               | 0.03                     | 1.1               | 36.2                 | 0.06                     | 1.5               | 0.07                     | 1.8               | 0.05                     | 1.2               |
| Liberia               | 0.01                     | 0.6               | 20.2                 | 0.02                     | 0.7               | 0.03                     | 0.8               | 0.02                     | 0.6               |
| Libya                 | 0.65                     | 1.6               | 25.6                 | 0.83                     | 2.1               | 0.96                     | 2.4               | 0.83                     | 2.1               |
| Lithuania             | 0.29                     | 0.7               | 45.1                 | 0.39                     | 0.7               | 0.40                     | 0.7               | 0.36                     | 0.6               |
| Luxembourg            | 0.36                     | 0.6               | 25.5                 | 0.59                     | 0.7               | 0.65                     | 0.7               | 0.58                     | 0.6               |
| Macedonia, FYR        | 0.22                     | 2.2               | 22.7                 | 0.36                     | 2.6               | 0.44                     | 3.2               | 0.34                     | 2.5               |
| Madagascar            | 0.04                     | 0.4               | 34.8                 | 0.07                     | 0.4               | 0.08                     | 0.5               | 0.06                     | 0.4               |
| Malawi                | 0.06                     | 1.0               | 57.1                 | 0.14                     | 1.2               | 0.16                     | 1.4               | 0.11                     | 1.0               |
| Malaysia              | 7.18                     | 2.4               | 31.9                 | 16.33                    | 2.9               | 19.26                    | 3.5               | 14.57                    | 2.6               |
| Maldives              | 0.05                     | 1.4               | 10.0                 | 0.14                     | 1.9               | 0.18                     | 2.4               | 0.13                     | 1.8               |
| Mali                  | 0.04                     | 0.3               | 31.2                 | 0.10                     | 0.4               | 0.11                     | 0.4               | 0.08                     | 0.3               |
| Malta                 | 0.16                     | 1.6               | 28.4                 | 0.24                     | 1.6               | 0.26                     | 1.7               | 0.23                     | 1.5               |
| Mauritania            | 0.02                     | 0.3               | 37.4                 | 0.03                     | 0.4               | 0.04                     | 0.5               | 0.03                     | 0.3               |
| Mauritius             | 0.29                     | 2.5               | 33.0                 | 0.58                     | 2.8               | 0.71                     | 3.4               | 0.51                     | 2.5               |
| Mexico                | 35.44                    | 3.1               | 27.9                 | 66.87                    | 3.8               | 76.99                    | 4.4               | 62.52                    | 3.5               |
| Micronesia, Fed. Sts. | 0.01                     | 3.7               | 26.8                 | 0.02                     | 4.8               | 0.02                     | 5.7               | 0.02                     | 4.5               |

SUPPLEMENTARY DATA

|                     |       |     |      |       |     |       |     |       |     |
|---------------------|-------|-----|------|-------|-----|-------|-----|-------|-----|
| Moldova             | 0.20  | 3.1 | 23.1 | 0.33  | 4.1 | 0.40  | 5.1 | 0.32  | 4.0 |
| Mongolia            | 0.17  | 1.5 | 42.3 | 0.39  | 1.6 | 0.46  | 1.8 | 0.33  | 1.3 |
| Montenegro          | 0.10  | 2.4 | 27.1 | 0.14  | 2.7 | 0.17  | 3.3 | 0.13  | 2.5 |
| Morocco             | 1.16  | 1.2 | 24.5 | 2.40  | 1.4 | 2.76  | 1.6 | 2.30  | 1.3 |
| Mozambique          | 0.16  | 1.1 | 43.8 | 0.39  | 1.2 | 0.44  | 1.4 | 0.31  | 1.0 |
| Myanmar             | 0.51  | 0.8 | 69.9 | 1.49  | 0.9 | 1.70  | 1.1 | 1.17  | 0.7 |
| Namibia             | 0.20  | 1.7 | 35.6 | 0.43  | 2.1 | 0.52  | 2.5 | 0.38  | 1.8 |
| Nepal               | 0.08  | 0.4 | 51.1 | 0.19  | 0.5 | 0.24  | 0.6 | 0.16  | 0.4 |
| Netherlands         | 9.49  | 1.3 | 30.5 | 14.14 | 1.3 | 15.46 | 1.4 | 13.74 | 1.3 |
| New Zealand         | 2.35  | 1.3 | 37.8 | 3.39  | 1.3 | 3.21  | 1.3 | 3.40  | 1.3 |
| Nicaragua           | 0.24  | 1.9 | 20.7 | 0.50  | 2.6 | 0.58  | 3.0 | 0.45  | 2.4 |
| Niger               | 0.02  | 0.3 | 31.8 | 0.04  | 0.3 | 0.05  | 0.3 | 0.04  | 0.2 |
| Nigeria             | 1.12  | 0.2 | 17.3 | 2.17  | 0.3 | 2.69  | 0.3 | 2.04  | 0.2 |
| Norway              | 4.79  | 1.2 | 24.9 | 7.09  | 1.3 | 7.80  | 1.4 | 6.91  | 1.3 |
| Oman                | 0.53  | 0.8 | 37.3 | 1.20  | 1.1 | 1.30  | 1.2 | 1.17  | 1.1 |
| Pakistan            | 1.43  | 0.5 | 61.8 | 2.97  | 0.6 | 3.51  | 0.7 | 2.47  | 0.5 |
| Panama              | 0.94  | 1.8 | 17.2 | 2.17  | 2.1 | 2.51  | 2.4 | 1.99  | 1.9 |
| Papua New Guinea    | 0.26  | 1.4 | 36.1 | 0.51  | 1.5 | 0.59  | 1.7 | 0.44  | 1.3 |
| Paraguay            | 0.67  | 2.5 | 12.5 | 1.34  | 3.1 | 1.56  | 3.5 | 1.25  | 2.8 |
| Peru                | 2.10  | 1.1 | 16.3 | 4.16  | 1.3 | 4.79  | 1.5 | 3.79  | 1.2 |
| Philippines         | 2.88  | 1.0 | 35.5 | 5.56  | 1.1 | 6.51  | 1.3 | 4.94  | 1.0 |
| Poland              | 4.74  | 1.0 | 43.0 | 6.87  | 1.1 | 7.24  | 1.1 | 6.20  | 1.0 |
| Portugal            | 3.50  | 1.8 | 35.0 | 4.87  | 1.8 | 5.29  | 2.0 | 4.67  | 1.8 |
| Qatar               | 1.11  | 0.7 | 30.5 | 2.18  | 0.9 | 2.40  | 1.0 | 2.18  | 0.9 |
| Romania             | 3.24  | 1.8 | 30.1 | 5.15  | 2.0 | 6.28  | 2.5 | 4.57  | 1.8 |
| Russian Federation  | 43.11 | 3.2 | 27.2 | 72.91 | 3.4 | 88.67 | 4.2 | 64.13 | 3.0 |
| Rwanda              | 0.08  | 0.9 | 29.1 | 0.21  | 1.3 | 0.25  | 1.6 | 0.18  | 1.1 |
| Samoa               | 0.01  | 1.8 | 48.4 | 0.02  | 1.8 | 0.02  | 2.1 | 0.02  | 1.6 |
| Sao Tome and Princ. | 0.00  | 0.8 | 12.6 | 0.00  | 0.9 | 0.01  | 1.1 | 0.00  | 0.8 |
| Saudi Arabia        | 10.75 | 1.6 | 44.1 | 20.24 | 2.2 | 21.29 | 2.3 | 19.21 | 2.1 |
| Senegal             | 0.05  | 0.3 | 31.3 | 0.09  | 0.4 | 0.11  | 0.5 | 0.09  | 0.4 |
| Serbia              | 1.64  | 4.4 | 18.2 | 2.17  | 5.0 | 2.68  | 6.1 | 2.07  | 4.7 |
| Seychelles          | 0.01  | 1.0 | 53.4 | 0.02  | 1.1 | 0.03  | 1.4 | 0.02  | 1.0 |
| Sierra Leone        | 0.06  | 1.3 | 52.7 | 0.09  | 1.5 | 0.10  | 1.7 | 0.07  | 1.2 |
| Singapore           | 3.47  | 1.2 | 52.5 | 5.91  | 1.3 | 5.49  | 1.2 | 6.73  | 1.5 |
| Slovak Republic     | 1.11  | 1.3 | 31.7 | 1.89  | 1.4 | 2.01  | 1.5 | 1.80  | 1.4 |
| Slovenia            | 0.64  | 1.5 | 38.5 | 0.94  | 1.6 | 1.00  | 1.7 | 0.94  | 1.6 |

SUPPLEMENTARY DATA

|                       |       |     |      |       |     |       |     |       |     |
|-----------------------|-------|-----|------|-------|-----|-------|-----|-------|-----|
| Solomon Islands       | 0.02  | 1.9 | 41.2 | 0.04  | 2.2 | 0.04  | 2.6 | 0.03  | 1.9 |
| South Africa          | 11.74 | 3.7 | 49.6 | 26.24 | 4.0 | 31.87 | 4.9 | 21.83 | 3.3 |
| South Sudan           | 0.10  | 1.1 | 55.2 | 0.14  | 1.2 | 0.16  | 1.4 | 0.11  | 1.0 |
| Spain                 | 16.43 | 1.4 | 40.0 | 24.48 | 1.5 | 26.33 | 1.7 | 27.12 | 1.7 |
| Sri Lanka             | 0.88  | 1.1 | 75.9 | 1.83  | 1.1 | 2.18  | 1.4 | 1.57  | 1.0 |
| St. Lucia             | 0.02  | 1.7 | 37.7 | 0.04  | 1.9 | 0.04  | 2.2 | 0.04  | 1.9 |
| St. Vinc. & the Gren. | 0.02  | 3.4 | 28.5 | 0.04  | 4.1 | 0.04  | 4.7 | 0.04  | 3.9 |
| Sudan                 | 1.52  | 1.6 | 48.8 | 3.30  | 1.8 | 4.03  | 2.2 | 2.87  | 1.6 |
| Suriname              | 0.14  | 2.8 | 40.4 | 0.21  | 3.1 | 0.24  | 3.5 | 0.19  | 2.8 |
| Swaziland             | 0.08  | 1.9 | 71.6 | 0.14  | 2.4 | 0.16  | 2.8 | 0.10  | 1.8 |
| Sweden                | 5.19  | 1.0 | 25.8 | 7.25  | 1.0 | 7.96  | 1.1 | 7.15  | 1.0 |
| Switzerland           | 8.58  | 1.3 | 35.1 | 12.15 | 1.3 | 13.33 | 1.4 | 11.61 | 1.3 |
| Syrian Arab Republic  | 0.58  | 0.6 | 77.2 | 1.37  | 0.8 | 1.45  | 0.9 | 1.07  | 0.6 |
| Tajikistan            | 0.07  | 0.8 | 9.4  | 0.13  | 1.1 | 0.17  | 1.4 | 0.12  | 1.0 |
| Tanzania              | 0.32  | 0.7 | 20.7 | 0.82  | 0.8 | 0.97  | 1.0 | 0.74  | 0.8 |
| Thailand              | 6.94  | 1.7 | 36.3 | 12.78 | 2.1 | 15.06 | 2.4 | 11.35 | 1.8 |

| Country             | 2015                     |                   |                      | Projections for 2030     |                   |                          |                   |                          |                   |
|---------------------|--------------------------|-------------------|----------------------|--------------------------|-------------------|--------------------------|-------------------|--------------------------|-------------------|
|                     | Total costs (Billion \$) | Total costs / GDP | Share indirect costs | Baseline scenario        |                   | Past-trends scenario     |                   | Target scenario          |                   |
|                     |                          |                   |                      | Total costs (Billion \$) | Total costs / GDP | Total costs (Billion \$) | Total costs / GDP | Total costs (Billion \$) | Total costs / GDP |
| Timor-Leste         | 0.01                     | 0.9               | 49.4                 | 0.02                     | 0.9               | 0.03                     | 1.0               | 0.02                     | 0.7               |
| Togo                | 0.03                     | 0.7               | 25.3                 | 0.06                     | 0.8               | 0.07                     | 1.0               | 0.05                     | 0.7               |
| Tonga               | 0.01                     | 1.7               | 46.2                 | 0.01                     | 1.9               | 0.01                     | 2.1               | 0.01                     | 1.7               |
| Trinidad and Tobago | 0.48                     | 2.0               | 57.9                 | 0.66                     | 2.2               | 0.67                     | 2.3               | 0.61                     | 2.1               |
| Tunisia             | 0.78                     | 1.8               | 23.5                 | 1.39                     | 2.2               | 1.61                     | 2.6               | 1.27                     | 2.0               |

SUPPLEMENTARY DATA

|                      |        |     |      |        |     |        |     |        |     |
|----------------------|--------|-----|------|--------|-----|--------|-----|--------|-----|
| Turkey               | 14.35  | 1.7 | 21.4 | 34.20  | 2.1 | 41.82  | 2.5 | 30.37  | 1.8 |
| Turkmenistan         | 0.26   | 0.7 | 46.3 | 0.68   | 0.9 | 0.81   | 1.1 | 0.57   | 0.8 |
| Uganda               | 0.19   | 0.7 | 34.7 | 0.49   | 0.8 | 0.57   | 1.0 | 0.43   | 0.7 |
| Ukraine              | 2.08   | 2.3 | 28.9 | 2.11   | 2.6 | 2.58   | 3.2 | 1.94   | 2.4 |
| United Arab Emirates | 3.76   | 1.1 | 40.4 | 6.61   | 1.4 | 7.27   | 1.6 | 6.53   | 1.4 |
| United Kingdom       | 23.70  | 0.8 | 39.7 | 35.08  | 0.8 | 37.84  | 0.9 | 33.94  | 0.8 |
| United States        | 475.24 | 2.6 | 36.0 | 668.94 | 2.5 | 680.07 | 2.6 | 652.59 | 2.5 |
| Uruguay              | 0.43   | 0.8 | 34.9 | 0.65   | 0.8 | 0.68   | 0.9 | 0.62   | 0.8 |
| Uzbekistan           | 0.56   | 0.8 | 26.8 | 1.27   | 1.1 | 1.57   | 1.3 | 1.14   | 1.0 |
| Vanuatu              | 0.02   | 2.2 | 43.8 | 0.03   | 2.6 | 0.03   | 3.0 | 0.02   | 2.3 |
| Venezuela, RB        | 9.13   | 2.0 | 21.8 | 13.78  | 2.4 | 15.92  | 2.8 | 12.49  | 2.2 |
| Vietnam              | 2.18   | 1.1 | 21.7 | 6.27   | 1.5 | 7.46   | 1.8 | 5.70   | 1.4 |
| Yemen, Rep.          | 0.24   | 0.6 | 38.9 | 0.51   | 0.9 | 0.55   | 1.0 | 0.44   | 0.8 |
| Zambia               | 0.29   | 1.4 | 54.5 | 0.63   | 1.6 | 0.77   | 1.9 | 0.52   | 1.3 |

Total costs / GDP and share of indirect costs are presented as percentages. Absolute costs are in 2015 US-\$.

**Supplementary Table S3.** Overview of key results for GBD data

|                              | 2015              | Projections for 2030 |                      |                   |
|------------------------------|-------------------|----------------------|----------------------|-------------------|
|                              |                   | Baseline scenario    | Past-trends scenario | Target scenario   |
| Prevalence (age group 20–79) | 8.6%              | 9.9%                 | 11.8%                | 9.7%              |
|                              | (8.3%–8.9%)       | (9.6%–10.3%)         | (11.4%–12.2%)        | (9.4%–10.1%)      |
| #deaths (age group 20–65)    | 540,438           | 772,442              | 859,721              | 514,961           |
|                              | (509,536–579,026) | (727,475–829,504)    | (808,939–924,186)    | (484,983–553,003) |
| Total costs (Trillion \$)    | 1.07              | 1.81                 | 2.02                 | 1.78              |
|                              | (1.04–1.09)       | (1.77–1.86)          | (1.97–2.07)          | (1.74–1.83)       |
| Direct costs (Trillion \$)   | 0.81              | 1.42                 | 1.60                 | 1.41              |



SUPPLEMENTARY DATA

\$)

|                                   |             |             |             |             |
|-----------------------------------|-------------|-------------|-------------|-------------|
|                                   | (0.79–0.83) | (1.39–1.46) | (1.56–1.63) | (1.38–1.45) |
| Indirect costs<br>(Trillion \$)   | 0.25        | 0.39        | 0.42        | 0.37        |
|                                   | (0.25–0.26) | (0.38–0.41) | (0.41–0.44) | (0.36–0.39) |
| Mortality <sup>a</sup>            | 11.2%       | 12.1%       | 11.4%       | 8.5%        |
| Drop out <sup>a</sup>             | 78.9%       | 77.5%       | 77.8%       | 80.7%       |
| Absenteeism <sup>a</sup>          | 6.4%        | 6.6%        | 6.8%        | 6.9%        |
| Presenteeism <sup>a</sup>         | 3.5%        | 3.8%        | 4.0%        | 4.0%        |
| Share indirect costs <sup>b</sup> | 23.9%       | 21.6%       | 21.0%       | 20.9%       |
| Total costs / global<br>GDP       | 1.5%        | 1.6%        | 1.8%        | 1.5%        |
|                                   | (1.4%–1.5%) | (1.5%–1.6%) | (1.7%–1.8%) | (1.5%–1.6%) |
| Mean (total costs /<br>GDP)       | 1.2%        | 1.4%        | 1.7%        | 1.4%        |
|                                   | (1.2%–1.2%) | (1.4%–1.5%) | (1.7%–1.7%) | (1.4%–1.4%) |

This table replicates the results from table 1 in the article using Global Burden of Disease Study data rather than data from the International Diabetes Federation. Numbers in parentheses are 95%-CI.

<sup>a</sup>Indicated numbers are the fraction of the respective indirect cost component in total indirect costs. 95%-CI not shown.

<sup>b</sup>Indicated numbers are the fraction of total costs allotted to indirect cost components. 95%-CI not shown.

**Supplementary Figure S1.** Sensitivity of results to different income elasticities

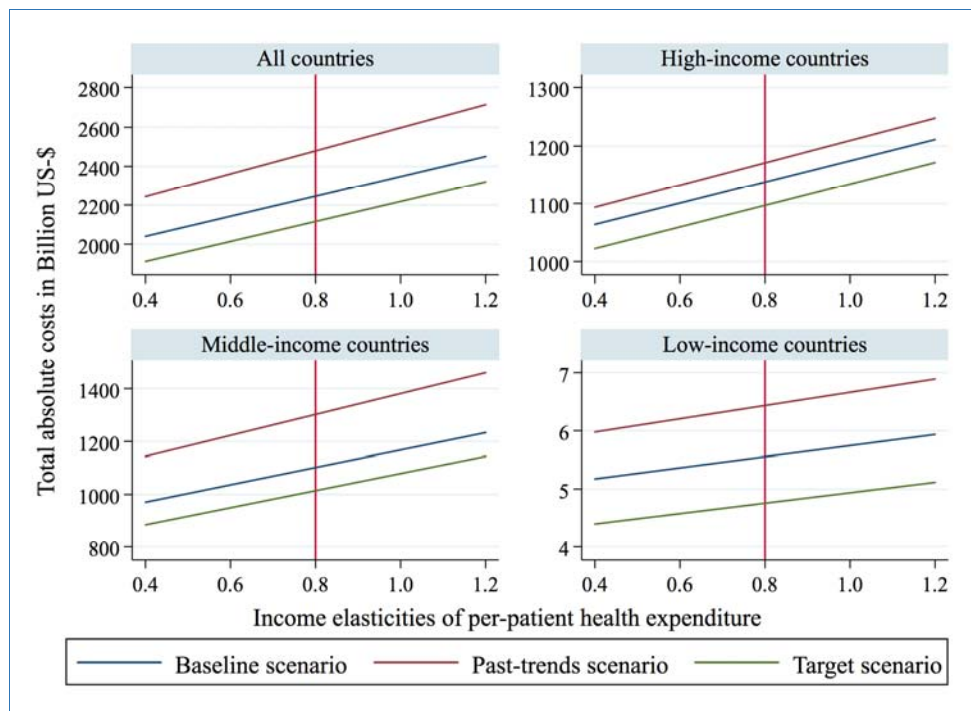

SUPPLEMENTARY DATA

The figure shows total costs in billion US-\$ in 2030 for varying income elasticities by country income group and for the full sample of countries. The vertical red line marks the elasticity used in the main analysis.

**Supplementary Figure S2.** Costs in 2030 for varying GDP growth assumptions (baseline scenario)

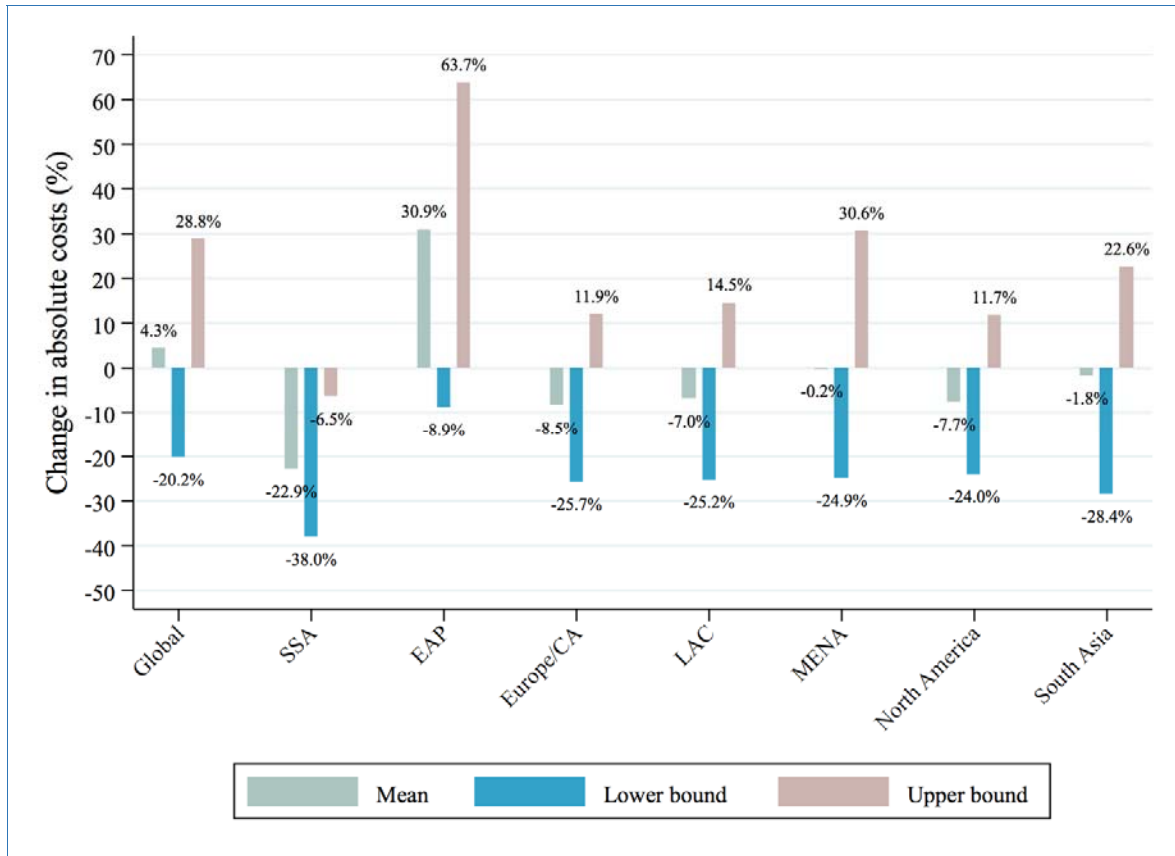

Figure illustrates how absolute costs change with different GDP assumptions (relative to costs estimated in main analysis). MENA is Middle East and North Africa, LAC is Latin America and the Caribbean, CA is Central Asia, EAP is East Asia and Pacific, SSA is sub-Saharan Africa.

SUPPLEMENTARY DATA

**Supplementary Figure S3.** Costs in 2030 for varying GDP growth assumptions (past-trends scenario)

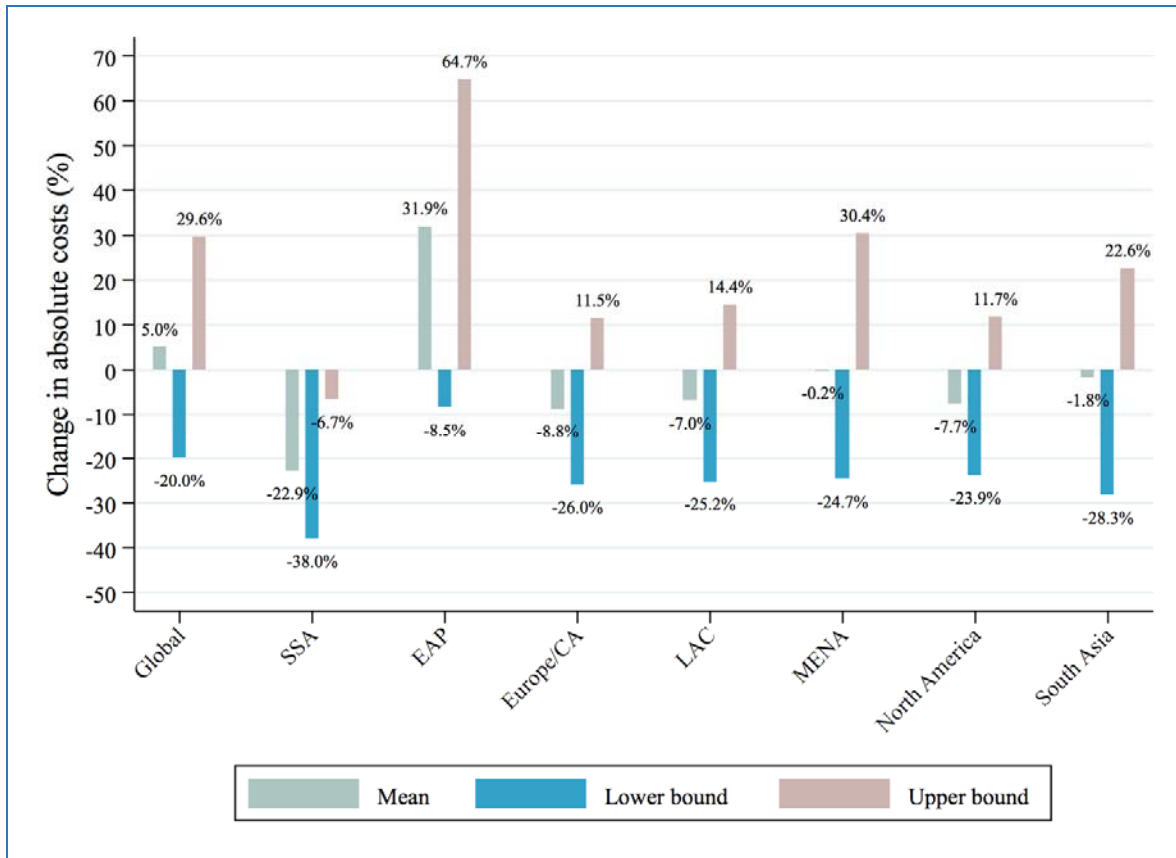

Figure illustrates how absolute costs change with different GDP assumptions (relative to costs estimated in main analysis). MENA is Middle East and North Africa, LAC is Latin America and the Caribbean, CA is Central Asia, EAP is East Asia and Pacific, SSA is sub-Saharan Africa.

SUPPLEMENTARY DATA

**Supplementary Figure S4.** Costs in 2030 for varying GDP growth assumptions (target scenario)

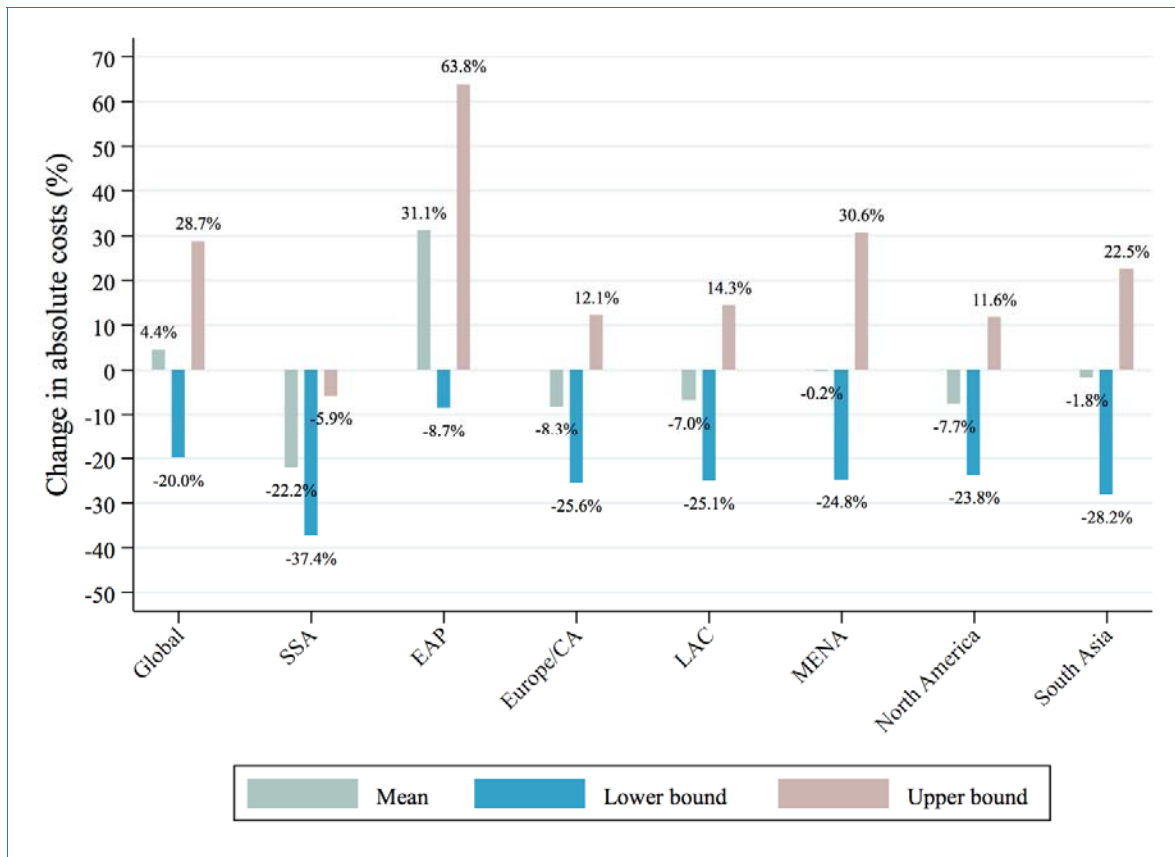

Figure illustrates how absolute costs change with different GDP assumptions (relative to costs estimated in main analysis). MENA is Middle East and North Africa, LAC is Latin America and the Caribbean, CA is Central Asia, EAP is East Asia and Pacific, SSA is sub-Saharan Africa.
